# Supplementary material for: The Chloroplast Phylogenomics and Systematics of Zoysia (Poaceae)
Source: MDPI journal article supplement (doi:10.3390/plants10081517), 2021-07-24
Supplement: s1 [file s1]

**Table S4. The Primer list of sequencing of *Zoysia sinica***

| Primer ID      | Sequence(5'-3')                | Strand* | Position |
|----------------|--------------------------------|---------|----------|
| <b>256</b>     | CTGGGGAGGTCCGTTTGATA           | +       | 135010   |
|                |                                | -       | 82210    |
| <b>W81925</b>  | GGTAGAATGCTAGATGCCCCG          | +       | 81562    |
|                |                                | -       | 135658   |
| <b>W137891</b> | TCTCACCATCCCCATAGTGT           | -       | 83124    |
|                |                                | +       | 134096   |
| <b>W-3</b>     | AATCCACTGCCTTGATCCAC           | -       | 135391   |
|                |                                | +       | 81829    |
| <b>H414</b>    | GGGGCGCTTCCGGTTCTGTT           | +       | 82784    |
|                |                                | -       | 134436   |
| <b>W-2</b>     | TTCTCGCTATTTGGAATGGA           | -       | 84137    |
|                |                                | +       | 133083   |
| <b>18</b>      | GTCTGTAAATACTGCATATTTGATTCCATC | +       | 83686    |
|                |                                | -       | 133524   |
| <b>340</b>     | TTGGAACGAGCATGAAGAAA           | -       | 84942    |
|                |                                | +       | 132278   |
| <b>W84777</b>  | CGTTTTTCATTTACCATCTCATG        | +       | 84386    |
|                |                                | -       | 132832   |
| <b>W133811</b> | TGGGATCGTTTGATCGATTT           | -       | 85710    |
|                |                                | +       | 131510   |
| <b>W88291</b>  | GAAGCCCAAAGAGGTGCATA           | -       | 86431    |
|                |                                | +       | 130771   |
| <b>W135950</b> | GGGTCGCTTCTTATGGACT            | +       | 85048    |
|                |                                | -       | 132173   |
| <b>H422</b>    | CTAAAGAGCGTGGAGGTTCG           | -       | 131075   |
|                |                                | +       | 86145    |
| <b>H423</b>    | GGTCTTCCTCCACTAGCAGG           | +       | 130150   |
|                |                                | -       | 87070    |
| <b>99</b>      | GTAGATGCTACATAGTTGGTTCTCAT     | +       | 129285   |
|                |                                | -       | 87929    |
| <b>106</b>     | TTGGGTTCATTGATATTCCTGGTATAG    | +       | 86807    |
|                |                                | -       | 130406   |
| <b>H424</b>    | TTTCGACCTTGGTTCCGTAG           | +       | 87782    |
|                |                                | -       | 129438   |
| <b>W90942</b>  | AATAAGGTTTGATCCTATTCATGG       | +       | 128122   |
|                |                                | -       | 89094    |
| <b>W92518</b>  | ATCCTTACTGTCCCTCTACAGAA        | -       | 90670    |
|                |                                | +       | 126547   |
| <b>W130055</b> | ATGGCAAGTGCTCTTCCTTG           | +       | 89485    |
|                |                                | -       | 127735   |
| <b>W92021</b>  | CGAATTGTTTGTTGACACGG           | +       | 90173    |
|                |                                | -       | 127047   |
| <b>W93455</b>  | ATGAGAGAAGCACAGAGGTCA          | -       | 91623    |
|                |                                | +       | 125596   |

|                  |                                 |   |        |
|------------------|---------------------------------|---|--------|
| <b>W94612</b>    | TCCCAAGGGCAGGTTCTTAC            | + | 124473 |
|                  |                                 | - | 92747  |
| <b>W128213</b>   | ATGATCCGATCGATTGC               | + | 91340  |
|                  |                                 | - | 125883 |
| <b>H427</b>      | ACCTTGACGTGGTGGAAGTC            | + | 92365  |
|                  |                                 | - | 124855 |
| <b>H428</b>      | AAGGGGCATGATGACTTGAC            | + | 123441 |
|                  |                                 | - | 93779  |
| <b>W95255</b>    | CCATCGTTTACGGCTAGGAC            | - | 123830 |
|                  |                                 | + | 93390  |
| <b>W125083</b>   | TACCACTGAGCTAATAGCCCCG          | + | 122781 |
|                  |                                 | - | 94438  |
| <b>W124160-1</b> | TCAATAGACTCCTTTTCGGG            | + | 122103 |
|                  |                                 | - | 95117  |
| <b>W125409</b>   | GCTGGATCACCTCCTTTTCA            | + | 94114  |
|                  |                                 | - | 123106 |
| <b>H429</b>      | CGCATCTTCACAGACCAAGA            | + | 94837  |
|                  |                                 | - | 122383 |
| <b>W122891</b>   | TGCTTATTTTCAACTCCCCG            | + | 120830 |
|                  |                                 | - | 96390  |
| <b>10</b>        | CGAACTGCTGCTGAATCCATGGGCAGGCAAG | + | 96443  |
|                  |                                 | - | 120765 |
| <b>W100297</b>   | GGTCTCCGCAAAGTCGTAAG            | - | 98195  |
|                  |                                 | + | 119025 |
| <b>97</b>        | ATATAGCTCAGTTGGTAGAGCTCCG       | - | 95286  |
|                  |                                 | + | 121929 |
| <b>98</b>        | ATGAAGCTTATCCCCCATCGTCTC        | - | 119922 |
|                  |                                 | + | 97294  |
| <b>W99809</b>    | GTCCATCGACTACGCCTTTC            | - | 119513 |
|                  |                                 | + | 97707  |
| <b>W119602-1</b> | CCTACAGTATCGTCACCGCA            | + | 117537 |
|                  |                                 | - | 99683  |
| <b>96</b>        | GTA ACTATAACGGTCCTAAGGTAGC      | + | 98317  |
|                  |                                 | - | 118898 |
| <b>9</b>         | GCCGACCGCTCTACCACTGAGCTACTGAGG  | + | 116846 |
|                  |                                 | - | 100364 |
| <b>94</b>        | GAAGGTCTCGGCGAGACGAGCCG         | + | 99296  |
|                  |                                 | - | 117921 |
| <b>W118236</b>   | TCGTGAAAAGTGATACCTGTGAA         | + | 116159 |
|                  |                                 | - | 101058 |
| <b>W119602</b>   | TGCGGTGACGATACTGTAGG            | + | 117537 |
|                  |                                 | - | 99683  |
| <b>W104124-1</b> | GCAAGTCTCCGTATCTTATTGG          | + | 115187 |
|                  |                                 | - | 102031 |

|                  |                                |   |        |
|------------------|--------------------------------|---|--------|
| <b>W118951</b>   | CTGGTCGTAGGTTCTGAATCC          | - | 116886 |
|                  |                                | + | 100334 |
| <b>W105880</b>   | ACGTGAAGAGGGAATTGTGC           | + | 103787 |
| <b>W107400-1</b> | GCAATAGATGTCTTTCACATACAA       | - | 105279 |
| <b>W107400</b>   | GCAATAGATGTCTTTCACATACAA       | + | 105279 |
| <b>W108711</b>   | TCTCAGTGGTTAATGATGCATG         | - | 106586 |
| <b>W108608</b>   | AAGCACAATAACTACGCCAAG          | + | 106483 |
| <b>W109967</b>   | CCGATAAATCCATGGGATA            | - | 107830 |
| <b>W110557</b>   | TAATTCTAACTCCCACATGATAAAA      | - | 108420 |
| <b>W-9</b>       | GAACAAAATCTGGATAGATACCGA       | + | 107408 |
| <b>W111122</b>   | GATAGAGCCATGCTGCG              | - | 108981 |
| <b>W112176</b>   | CGATTCATTTCAATCTGAGGA          | + | 110038 |
| <b>W114051</b>   | TTCGGTTTGATAACCTGCTA           | - | 111971 |
| <b>W112816</b>   | CCTAGTAGAAGAACAAATCCCC         | + | 110677 |
| <b>W116493</b>   | CGATGCGAAAGTAATTATGC           | - | 114429 |
| <b>W-19</b>      | GTAAAGAGTTTACACTGCTTATG        | + | 112968 |
| <b>W98266</b>    | CTTATCTCCAGCCCGTGAAC           | + | 96155  |
|                  |                                | - | 121065 |
| <b>W104124</b>   | GCAAGTCTCCGTATCTTATTGG         | - | 115187 |
|                  |                                | + | 102031 |
| <b>82</b>        | CTATGGAGAAATTGGTAGACACGCTGCTCT | - | 106038 |
| <b>W111245</b>   | ATTTGCTTGGCTTTACATCC           | + | 109104 |
| <b>W113787</b>   | TTGATCCATTCTCATCCTGG           | + | 111707 |
| <b>W114453</b>   | CGCTTCCGAATTGATCTCAT           | + | 112369 |
| <b>15</b>        | GCTGTTAATACGAATAGAGAACTCTGT    | - | 88613  |
|                  |                                | + | 128598 |
| <b>H426</b>      | CCCTATTGTTCCGATGGAGA           | + | 128440 |
|                  |                                | - | 88780  |
| <b>259</b>       | AAAAACCAAACCTCTGCCTTACG        | + | 126604 |
|                  |                                | - | 90614  |
| <b>W130741</b>   | GAACAATAGGGCCGTTATGC           | + | 88789  |
|                  |                                | - | 128431 |
| <b>11</b>        | CATTTCGCTCGCCGCTACTACGGGAATCGC | + | 120682 |
|                  |                                | - | 96528  |
| <b>100</b>       | GGGCGAGGTCTCTGGTTCAAGTCCAGGA   | + | 65182  |
|                  |                                | - | 122030 |
| <b>W98861</b>    | AATACTCCTGGGTGACCGATAG         | - | 96754  |
|                  |                                | + | 120464 |
| <b>W-24</b>      | CTGTAGAGAATTGAGAATTTTCATG      | + | 101297 |
|                  |                                | - | 115918 |
| <b>W-25</b>      | CGTGAGACATATAATCGTCGC          | - | 104178 |
| <b>W110391</b>   | TCAATCTTTCCAAATCTAATCC         | + | 108254 |
| <b>W-27</b>      | GAATTAGCCAATAAATTGGCTAT        | - | 109448 |
| <b>W115989</b>   | TTACATAAAGCTCTTGCTTTGATA       | + | 113925 |
| <b>395</b>       | CTTCGGGATCGAACATCAAT           | - | 4642   |

|                |                                  |   |        |
|----------------|----------------------------------|---|--------|
| <b>W4052</b>   | CAAAATAAACAGATCGGT               | + | 4058   |
| <b>23</b>      | TTAAAAGCCGAGTACTCTACCGTTGAGTTA   | + | 3889   |
| <b>276</b>     | ACCATTAAAGCAGCCCAAGC             | - | 18088  |
| <b>W-22</b>    | AAGATCTTCTTTTCTCCATCTC           | + | 16695  |
| <b>W31365</b>  | TTTTGATGCAGCAAGTCAGG             | + | 30894  |
| <b>W32396</b>  | GCAAAACTCAGATTGGAGAAGAA          | - | 31920  |
| <b>W34488</b>  | ACCGATATTTTAGCAACAAATCTAA        | + | 34001  |
| <b>W36012</b>  | TGCTCGTATTATAGGTCTTGGTGA         | - | 35530  |
| <b>251</b>     | GTAGCCCAAACAAGATGTCCA            | - | 38175  |
| <b>W36871</b>  | GACGTTTCCGCCTATATTCC             | + | 36389  |
| <b>43</b>      | GCCCACTATTGGCCAAACCACCTGGGCACTAG | + | 42068  |
| <b>246</b>     | CCTTCCCTTAGAACCGTACTTG           | - | 43230  |
| <b>H458</b>    | TGAGCCTTGGTATGGAAACC             | - | 47809  |
| <b>W47393</b>  | GCATTACAAATGCGATGCTC             | - | 46919  |
| <b>W49145</b>  | TGAAAATCCTCGTGTCACCA             | - | 48780  |
| <b>224</b>     | CCATGCATAAACTAAACCAACAA          | + | 50709  |
| <b>235</b>     | CCATGCATAAACTAAACCAACAA          | - | 51986  |
| <b>W56293</b>  | CTTGGCAGCATTCCGAGTA              | - | 55840  |
| <b>W56135</b>  | AGACCCTGTCGTTGTGAGAA             | + | 55682  |
| <b>244</b>     | AAAACAAACGCGCTACCAAG             | + | 65003  |
| <b>W67341</b>  | GAAACTCCAACCAGAATTTAAGA          | - | 66897  |
| <b>W76331</b>  | TGGATTCTTCAATACCTACTATTGT        | - | 75923  |
| <b>W-17</b>    | GCCGTCAATGATTGGTGAGC             | + | 74637  |
| <b>253</b>     | GCATTGTCATCATATCGTATTATCA        | - | 78131  |
| <b>W76846</b>  | GGGTGATGCTTTTCTTGAGC             | + | 76436  |
| <b>W18889</b>  | TTCTGCCCTAAGACTATGGATT           | + | 18210  |
| <b>W-20</b>    | TTCAATTGGTTAGAGCACCG             | + | 16078  |
| <b>W20819</b>  | GGAATGGAAATGAGGGAATG             | - | 20281  |
| <b>76</b>      | AATCCACTGATTTCTGCCGCTTCCGTTATTGC | + | 33232  |
| <b>40</b>      | CCTTGGCTAAACCTTGGAATCGTAATGC     | - | 40119  |
| <b>165</b>     | CATTACCAAGATTAGCACGG             | + | 165    |
| <b>127</b>     | GAATGACCCAGTATCGAATACTGGTAA      | + | 62906  |
| <b>231</b>     | TATAATAGGTAGGGATGACAGGA          | - | 64959  |
| <b>W65536</b>  | AAAACAAACGCGCTACCAAG             | - | 65003  |
| <b>237</b>     | AAGTATTTTACGATTAAGAAG            | - | 67254  |
| <b>238</b>     | CGCTCTGTAGGATTTGAACCTAC          | + | 64766  |
| <b>129</b>     | GCTCTGTAGGATTTGAACCTACGACATC     | + | 64767  |
| <b>58</b>      | CTGCCGTATTTATGTTAATGCACTTTCCAATG | + | 103787 |
| <b>W71818</b>  | TCTTCTTCCGAGAACCACCT             | + | 71416  |
| <b>69</b>      | CAACCCCTTGGGGTTATCCTGCACTTGGA    | + | 135217 |
|                |                                  | - | 81993  |
| <b>W80090</b>  | TCCACATCCCTTTAGTTTTGC            | + | 79680  |
| <b>W105376</b> | GACCAGAAGCAAGCAAGAGG             | - | 103283 |
| <b>W117523</b> | GGATAGAAGGGTACATTCTTTTATT        | - | 115448 |
|                |                                  | + | 101767 |
| <b>W-35</b>    | GTGATAAATTCATATGAATTTATGGA       | + | 102722 |

|                 |                                   |   |        |
|-----------------|-----------------------------------|---|--------|
| <b>W-36</b>     | GAATAGACAGGTGAACTGAGAATA          | - | 104349 |
| <b>W1683</b>    | ATTCACCAGGTCATCAATACG             | + | 1694   |
| <b>W-28</b>     | GATTGCAAACCCCTCAGATA              | - | 2903   |
| <b>24</b>       | CGCCGCTTTAGTCCACTCAGCCATCTCTCC    | - | 8118   |
| <b>25</b>       | CTGGGACGGAAGGATTCTGAACCTCCGAATAGC | + | 6821   |
| <b>320</b>      | TAGCCTTTGTTTGGCAAGCT              | - | 7390   |
| <b>W6509</b>    | TTTTGTGTCGTGCAGAGC                | + | 6771   |
| <b>W7136</b>    | GCGTTTGTTTGGCAAGC                 | + | 7391   |
| <b>W-29</b>     | GCACCCAGATTTGAACTGGGGAT           | + | 19046  |
| <b>W21210</b>   | CTCGGAATTAGACCATAAGGG             | - | 20672  |
| <b>145</b>      | GATTGGCTGTAGGGCTTGCTTCT           | - | 33269  |
| <b>W-14</b>     | GGGGTTGTATGATATATCAGGC            | + | 31708  |
| <b>321</b>      | TGCTTAGTCTAGCTTTTATGGAAGC         | - | 33389  |
| <b>W48442-1</b> | GGATAGGTGCAGAGACTCAATG            | - | 47944  |
| <b>218</b>      | TTCCTTCCCTTAGAACCGTACTTGAGAG      | - | 43228  |
| <b>W46864</b>   | CAGACCATAATGAAAACGCAAT            | + | 46390  |
| <b>W73004-1</b> | AAATAGGGAAGAGAAAAGTCAAG           | - | 72600  |
| <b>W77590</b>   | ATTTTGACCCTATCCCCCAT              | - | 77184  |
| <b>W80234</b>   | GGATCTCGACAATACGAAGCA             | - | 79820  |
| <b>W-33</b>     | GTCCTATGACTCGAATACACATC           | + | 78302  |
| <b>W947</b>     | GAAACAGGCTCACGAATACCA             | + | 947    |
| <b>W4463</b>    | TCAAAGTTCTTTCTTTATCTTTAAA         | + | 4472   |
| <b>W5430</b>    | CTATGTCGAGCCAAGAGCATT             | - | 5440   |
| <b>W-10</b>     | AGTGGTATCGAGAATTGATCC             | + | 5594   |
| <b>W-11</b>     | TAAGGAGGTATTTTGTCTTTGG            | - | 7108   |
| <b>W33791</b>   | CTGCTGCAGGACAAGCTGTA              | - | 33317  |
| <b>W-15</b>     | CAATATATAGAATTCCGGAATTG           | - | 32780  |
| <b>H465</b>     | AGTGGTTCAAGGCGTAGCAT              | - | 45639  |
| <b>W47393-1</b> | GCATTACAAATGCGATGCTC              | - | 46919  |
| <b>W-31</b>     | TCTAGGCATAATTCCCAATCC             | + | 45028  |
| <b>W48828</b>   | CCTCTATCCCCAAACCCTCT              | + | 48393  |
| <b>W50130</b>   | AGCACATTGGGAACGTAAAT              | + | 49672  |
| <b>W-32</b>     | GGTATGAGTACTGCGCCGAACATAAACT      | - | 50056  |
| <b>W51430</b>   | TACCAAAAATAGGAATAAGGCTTG          | + | 50973  |
| <b>212</b>      | CAGGAGCAGGGTCGGTCAAAT             | - | 53911  |
| <b>374</b>      | CATCTCGGAAATATTCAGCCA             | - | 54142  |
| <b>W52686</b>   | CCAAAGTGTTTCAAAGGAGGA             | + | 52221  |
| <b>W71184-1</b> | GAATTGTGAGAGCGGACGTT              | + | 70775  |
| <b>W72808</b>   | TCATCAAGCGGTTCTTATTCG             | + | 72418  |
| <b>W78260</b>   | GCAATAGTGTCTTGCCCAT               | - | 77851  |
| <b>W81925-1</b> | GGTAGAATGCTAGATGCCCCG             | - | 81562  |
| <b>W-23</b>     | TAACGTGAATTGTATCGATTTC            | - | 80562  |

\*Primer sequences mentioned with both a “+” and “-” strand position are located in the Inverted Repeat region.
