# Supplementary material for: The Chloroplast Phylogenomics and Systematics of Zoysia (Poaceae)
Source: MDPI journal article supplement (doi:10.3390/plants10081517), 2021-07-24
Supplement: s1 [file s1]

**Table S3. The Primer list of sequencing of *Zoysia macrostachya***

| Primer ID      | Sequence(5'-3')                | Strand* | Position |
|----------------|--------------------------------|---------|----------|
| <b>256</b>     | CTGGGGAGGTCCGTTTGATA           | +       | 135042   |
|                |                                | -       | 82236    |
| <b>W81925</b>  | GGTAGAATGCTAGATGCCCCG          | +       | 81588    |
|                |                                | -       | 135690   |
| <b>W137891</b> | TCTCACCATCCCCATAGTGT           | -       | 83150    |
|                |                                | +       | 134128   |
| <b>W-3</b>     | AATCCACTGCCTTGATCCAC           | -       | 135501   |
|                |                                | +       | 81855    |
| <b>H414</b>    | GGGGCGCTTCCGTTTCTGTT           | +       | 82810    |
|                |                                | -       | 134468   |
| <b>W-2</b>     | TTCTCGCTATTTGGAATGGA           | -       | 84163    |
|                |                                | +       | 133115   |
| <b>18</b>      | GTCTGTAAATACTGCATATTTGATTCCATC | +       | 83758    |
|                |                                | -       | 133556   |
| <b>340</b>     | TTGGAACGAGCATGAAGAAA           | -       | 84968    |
|                |                                | +       | 132310   |
| <b>W84777</b>  | CGTTTTTCATTTACCATCTCATG        | +       | 84412    |
|                |                                | -       | 132864   |
| <b>W133811</b> | TGGGATCGTTTGATCGATTT           | -       | 85736    |
|                |                                | +       | 131542   |
| <b>W88291</b>  | GAAGCCCAAAGAGGTGCATA           | -       | 86458    |
|                |                                | +       | 130820   |
| <b>W135950</b> | GGGTCGCTTCTTATGGACT            | +       | 85074    |
|                |                                | -       | 132205   |
| <b>H422</b>    | CTAAAGAGCGTGGAGGTTCG           | -       | 131106   |
|                |                                | +       | 86172    |
| <b>H423</b>    | GGTCTTCCTCCACTAGCAGG           | +       | 130181   |
|                |                                | -       | 87097    |
| <b>99</b>      | GTAGATGCTACATAGTTGGTTCTCAT     | +       | 129316   |
|                |                                | -       | 87956    |
| <b>106</b>     | TTGGGTTTCATTGATATTCCTGGTATAG   | +       | 86834    |
|                |                                | -       | 130437   |
| <b>H424</b>    | TTTCGACCTTGGTTCCGTAG           | +       | 87809    |
|                |                                | -       | 129469   |
| <b>W90942</b>  | AATAAGGTTTGATCCTATTCATGG       | +       | 128153   |
|                |                                | -       | 89121    |
| <b>W92518</b>  | ATCCTTACTGTCCCTCTACAGAA        | -       | 90697    |
|                |                                | +       | 126578   |
| <b>W130055</b> | ATGGCAAGTGCTCTTCCTTG           | +       | 89512    |
|                |                                | -       | 127078   |
| <b>W92021</b>  | CGAATTGTTTGTTGACACGG           | +       | 90200    |
|                |                                | -       | 127029   |
| <b>W93455</b>  | ATGAGAGAAGCACAGAGGTCA          | -       | 91650    |
|                |                                | +       | 125627   |

|                |                                 |   |        |
|----------------|---------------------------------|---|--------|
| <b>W94612</b>  | TCCCAAGGGCAGGTTCTTAC            | + | 124455 |
|                |                                 | - | 92774  |
| <b>W128213</b> | ATGATCCGATCGATTGC               | + | 91367  |
|                |                                 | - | 125914 |
| <b>H427</b>    | ACCTTGACGTGGTGGAAGTC            | + | 92392  |
|                |                                 | - | 124886 |
| <b>H428</b>    | AAGGGGCATGATGACTTGAC            | + | 123472 |
|                |                                 | - | 93806  |
| <b>W95255</b>  | CCATCGTTTACGGCTAGGAC            | - | 123861 |
|                |                                 | + | 93417  |
| <b>W125083</b> | TACCACTGAGCTAATAGCCCCG          | + | 122812 |
|                |                                 | - | 94465  |
| <b>W124160</b> | CCCGAAAAGGAGTCTATTGA            | - | 95144  |
|                |                                 | + | 122134 |
| <b>W125409</b> | GCTGGATCACCTCCTTTTCA            | + | 94141  |
|                |                                 | - | 123137 |
| <b>H429</b>    | CGCATCTTCACAGACCAAGA            | + | 94864  |
|                |                                 | - | 122414 |
| <b>W122891</b> | TGCTTATTTTCAACTCCCCG            | + | 120861 |
|                |                                 | - | 96417  |
| <b>10</b>      | CGAACTGCTGCTGAATCCATGGGCAGGCAAG | + | 96470  |
|                |                                 | - | 120796 |
| <b>W100297</b> | GGTCTCCGCAAAGTCGTAAG            | - | 98222  |
|                |                                 | + | 119056 |
| <b>W99809</b>  | GTCCATCGACTACGCCTTTC            | - | 119544 |
|                |                                 | + | 97734  |
| <b>W119602</b> | TGCGGTGACGATACTGTAGG            | + | 117568 |
|                |                                 | - | 99710  |
| <b>96</b>      | GTA ACTATAACGGTCCTAAGGTAGC      | + | 98344  |
|                |                                 | - | 118929 |
| <b>W104124</b> | GCAAGTCTCCGTATCTTATTGG          | - | 115218 |
|                |                                 | + | 102115 |
| <b>W118951</b> | CTGGTCGTAGGTTCGAATCC            | - | 116917 |
|                |                                 | + | 100361 |
| <b>W105880</b> | ACGTGAAGAGGGAATTGTGC            | + | 103814 |
| <b>W107400</b> | GCAATAGATGTCTTTCACATACAA        | + | 105306 |
| <b>W108711</b> | TCTCAGTGGTTAATGATGCATG          | - | 106613 |
| <b>W108608</b> | AAGCACAATAACTACGCCAAG           | + | 106510 |
| <b>W109967</b> | CCGATAAATCCATGGGATA             | - | 107857 |
| <b>W110557</b> | TAATTCTAACTCCCACATGATAAAA       | - | 108447 |
| <b>W-9</b>     | GAACAAAATCTGGATAGATACCGA        | + | 107435 |
| <b>W111122</b> | GATAGAGCCATGCTGCG               | - | 109008 |
| <b>W112176</b> | CGATTCATTTCAATCTGAGGA           | + | 110127 |
| <b>W114051</b> | TTCGGTTTGATAACCTGCTA            | - | 112002 |
| <b>W112816</b> | CCTAGTAGAAGAACAAATCCCC          | + | 110708 |
| <b>W116493</b> | CGATGCGAAAGTAATTATGC            | - | 114460 |

|                |                                   |   |        |
|----------------|-----------------------------------|---|--------|
| <b>W-19</b>    | GTAAAGAGTTTACACTGCTTATG           | + | 112999 |
| <b>W98266</b>  | CTTATCTCCAGCCCGTGAAC              | + | 96182  |
|                |                                   | - | 121096 |
| <b>W111245</b> | ATTTGCTTGGCTTTACATCC              | + | 109131 |
| <b>W113787</b> | TTGATCCATTCTCATCCTGG              | + | 111738 |
| <b>W114453</b> | CGCTTCCGAATTGATCTCAT              | + | 112400 |
| <b>103</b>     | GATATCATATTTCATGGAATATGATTC       | + | 131024 |
|                |                                   | - | 86248  |
| <b>14</b>      | TAGCCCCAGAATGTTTCAGTTTATGCTCCT    | - | 128711 |
|                |                                   | + | 88557  |
| <b>339</b>     | AACTGCAAAATCCGATCCAA              | + | 127510 |
|                |                                   | - | 89768  |
| <b>W-1</b>     | CGAGATCCACCCTACAATA               | + | 127379 |
|                |                                   | - | 89900  |
| <b>97</b>      | ATATAGCTCAGTTGGTAGAGCTCCG         | - | 95313  |
|                |                                   | + | 121960 |
| <b>11</b>      | CATTTGCTCGCCGCTACTACGGGAATCGC     | + | 120713 |
|                |                                   | - | 96555  |
| <b>100</b>     | GGGCGAGGTCTCTGGTTCAAGTCCAGGA      | + | 95209  |
|                |                                   | - | 122061 |
| <b>W98861</b>  | CTATCGGTCACCCAGGAGTATT            | + | 120495 |
|                |                                   | - | 96781  |
| <b>98</b>      | ATGAAGCTTATCCCCATCGTCTC           | - | 119953 |
|                |                                   | + | 97321  |
| <b>95</b>      | TCGTGCGGGTCGGAACCTACCCGAC         | + | 118894 |
|                |                                   | - | 98379  |
| <b>9</b>       | GCCGACCGCTCTACCACTGAGCTACTGAGG    | + | 116877 |
|                |                                   | - | 100391 |
| <b>W-24</b>    | CTGTAGAGAATTGAGAATTTTCATG         | + | 101324 |
|                |                                   | - | 115949 |
| <b>W-25</b>    | CGTGAGACATATAATCGTCGC             | - | 104205 |
| <b>H409</b>    | GGTGAAATTGGTAGACACGC              | - | 106069 |
| <b>W-26</b>    | GAATTTGACCTTCGCTTTATCTCC          | + | 105004 |
| <b>W110391</b> | TCAATCTTTCCAAATCTAATCC            | + | 108236 |
| <b>W-27</b>    | GAATTAGCCAATAAATTGGCTAT           | - | 109475 |
| <b>H401</b>    | GCCAGTCCAATAGCTGCTTC              | + | 109808 |
| <b>W112922</b> | CTGACTAAAACTAAAAGATTCAAGG         | - | 110814 |
| <b>W115117</b> | AAATTAATAAGCTGTTTTGTTTCAC         | - | 113076 |
| <b>W115989</b> | TTACATAAAGCTCTTGCTTTGATA          | + | 113956 |
| <b>W-4</b>     | TTGTTTACGAAGAAATAATAACAA          | + | 2520   |
| <b>W-5</b>     | CAGATCGGTTAAATTTCACTG             | - | 4067   |
| <b>24</b>      | CGCCGCTTTAGTCCACTCAGCCATCTCTCC    | - | 8119   |
| <b>25</b>      | CTGGGACGGAAGGATTTCGAACCTCCGAATAGC | + | 6821   |
| <b>W13690</b>  | AGAACGAATCACACTTTTACCAC           | - | 13842  |
| <b>W-12</b>    | TCCTACGAAAGCATAACAGAAAA           | - | 15346  |
| <b>W17778</b>  | AGAATGCAAGTCCTCCCCTT              | + | 17040  |

|         |                                  |   |        |
|---------|----------------------------------|---|--------|
| W-13    | TTCTGACACCTTAACGCATAGTTT         | - | 18779  |
| 309     | TCTTGCATTTATTGCTACTGCAC          | + | 17151  |
| W18889  | TTCTGCCCTAAGACTATGGATT           | + | 18212  |
| W20819  | GGAATGGAAATGAGGGAATG             | - | 20282  |
| W27367  | CCGACCTTGTACGATCCC               | + | 25861  |
| W29456  | CAATACCAATTCCTTTTATTCCA          | - | 28992  |
| W27717  | CGTCGATTACCAAAAACAAGC            | + | 27211  |
| 175     | CTTGGGGATTCTTGATTGGTGCTG         | - | 29810  |
| W30641  | TTGGTTGAAAGGCCTGAAAG             | + | 30183  |
| W31373  | CAGCAAGTCAGGGAAAAAGC             | - | 30924  |
| W34488  | ACCGATATTTTAGCAACAAATCTAA        | + | 34022  |
| W36012  | TGCTCGTATTATAGGTCTTGGTGA         | - | 35551  |
| 40      | CCTTGGCTAAACCTTGGAATCGTAATGC     | - | 40139  |
| 165     | CATTACCAAGATTAGCACGG             | + | 165    |
| 43      | GCCCACTATTGGCCAAACCACCTGGGCACTAG | + | 42088  |
| 246     | CCTTCCCTTAGAACCGTACTTG           | - | 43249  |
| H458    | TGAGCCTTGGTATGGAAACC             | - | 47831  |
| W47393  | GCATTACAAATGCGATGCTC             | - | 46944  |
| 224     | CCATGCATAAACTAAACCAACAA          | + | 50729  |
| W53119  | CCCTTGTCAGAGATATCTTAACAT         | - | 52677  |
| w55203  | ACAGCTCTAACTCGATTATTTCT          | + | 54722  |
| W-7     | CTATCACATCGAACCCGTTT             | - | 56007  |
| W-16    | GTGGACTAGCACTTGATTTCG            | + | 55099  |
| w56135  | AGACCCTGTCTGTTGTGAGAA            | + | 55705  |
| W56293  | CTTGGCAGCATTCCGAGTA              | - | 55893  |
| W74410  | GCATTCATTTTCTTTGCATCG            | + | 74027  |
| W76331  | TGGATTCTTCAATACCTACTATTGT        | - | 75946  |
| W-17    | GCCGTCAATGATTGGTGAGC             | + | 74660  |
| W79014  | GGTTTAACAACGGCTACCCA             | - | 78629  |
| W-23    | TAACGTGAATTGTATCGATTTT           | - | 80586  |
| 69      | CAACCCCTTGGGGTTATCCTGCACTTGGAA   | + | 135249 |
|         |                                  | - | 82019  |
| W80090  | TCCACATCCCTTTAGTTTTGC            | + | 79704  |
| W105376 | GACCAGAAGCAAGCAAGAGG             | - | 13310  |
| W117523 | AATAAAAGAATGTACCCTTCTATCC        | + | 101794 |
|         |                                  | - | 115479 |
| W-35    | GTGATAAATTCATATGAATTTATGGA       | + | 102749 |
| W-36    | GAATAGACAGGTGAACTGAGAATA         | - | 104376 |
| W1683   | ATTCACCAGGTCATCAATACG            | + | 1695   |
| W-28    | GATTGCAAACCCCTCAGATA             | - | 2904   |
| W3004   | TGCTGATACATTAGAAAAATTAAA         | + | 3016   |
| 395     | CTTCGGGATCGAACATCAAT             | - | 4644   |
| 36      | CCCATCGTCTAGTGGTTTAGGACATCTCTC   | + | 15503  |
| W18757  | ACCATTAAAGCAGCCCAAGC             | - | 18090  |
| W16206  | CATCTCTCTTTCAAGGAGGCA            | + | 15525  |
| W-20    | TTCAATTGGTTAGAGCACCG             | + | 16081  |

|           |                               |   |        |
|-----------|-------------------------------|---|--------|
| W-29      | GCACCCAGATTTGAACTGGGGAT       | + | 19048  |
| W21210    | CTCGGAATTAGACCATAAGGG         | - | 20673  |
| W31653    | TATGACGAGGTTGCCTGACA          | - | 31204  |
| 145       | GATTGGCTGTAGGGCTTGCTTCT       | - | 33290  |
| W-14      | GGGGTTGTATGATATATCAGGC        | + | 31729  |
| 321       | TGCTTAGTCTAGCTTTTATGGAAGC     | - | 33410  |
| W39284    | GTCTTACCATGAGCAGATTGTAT       | - | 38762  |
| W44580    | CCTTTGTATGCTCTCCATTGC         | + | 44044  |
| W-30      | GAGTGGTTTTATTCAAATTCAAAGC     | + | 43066  |
| W48442-1  | GGATAGGTGCAGAGACTCAATG        | - | 47966  |
| W48442    | GGATAGGTGCAGAGACTCAATG        | + | 47966  |
| W49145    | TGAAAATCCTCGTGTACCA           | - | 48802  |
| 235       | TAGGGCTATACGGACTCG            | - | 52009  |
| W51430    | TACCAAAATAGGAATAAGGCTTG       | + | 50993  |
| 212       | CAGGAGCAGGGTCGGTCAAAT         | - | 53934  |
| W52686    | CCAAAGTGTTTCAAAGGAGGA         | + | 52244  |
| H437      | CATGAGTTGTAGGGAGGGAT          | - | 55734  |
| W55204    | CAGCTCTAACTCGATTATTTCTAA      | + | 54752  |
| W56293-1  | CTTGGCAGCATTCCGAGTA           | - | 55863  |
| W56344    | AGGGGCTGCAGTAGCTG             | - | 55914  |
| W80234    | GGATCTCGACAATACGAAGCA         | - | 79844  |
| W-33      | GCTCCTATGACTCGAATACACATC      | + | 78325  |
| W80924    | TGACGTGGATTGTATCGATTTC        | + | 80586  |
| W81925-1  | GGTAGAATGCTAGATGCCCCG         | - | 81588  |
|           |                               | + | 135690 |
| W947      | GAAACAGGCTCACGAATACCA         | + | 947    |
| 72        | CCCGTTGCCTTACCACTTGCCACGCCCCA | - | 6863   |
| W4463     | TCAAAGTTCTTTCTTTATCTTTAAA     | + | 4474   |
| W-21      | TTCTGCCCTAAGACTCTGGATG        | - | 18212  |
| 276       | ACCATTAAAGCAGCCCAAGC          | - | 18086  |
| W23499    | TGAGCAAGAGGCTTCAAGAAA         | + | 22962  |
| W25894-1  | GCTCCGATGGAACTAGATCA          | - | 25348  |
| W32396    | GCAAAACTCAGATTGGAGAAGAA       | - | 31918  |
| W41129    | CGACTGCATTTTCCAAGTGA          | - | 40607  |
| W41797    | TGTGGTGTGTGAACAAGGAAA         | - | 41254  |
| W45138    | TGTGGTGTGTGAACAAGGAAA         | - | 41275  |
| W47393-1  | GCATTACAAATGCGATGCTC          | - | 46944  |
| W-31      | TCTAGGCATAATTCCCAATCC         | + | 45047  |
| W-32      | GGTATGAGTACTGCGCCGAACATAAACT  | - | 50076  |
| W48828    | CCTCTATCCCCAAACCCTCT          | + | 48415  |
| 320       | TAGCCTTTGTTTGGCAAGCT          | - | 7390   |
| W7487     | TGGATCTGTGCGGTAAGGAAAA        | + | 7764   |
| W-11      | TAAGGAGGTATTTTGTCTTTGG        | - | 7108   |
| W114453-1 | CGCTTCCGAATTGATCTCAT          | - | 112400 |
| W48828-1  | CCTCTATCCCCAAACCCTCT          | - | 48415  |

|                 |                                |   |       |
|-----------------|--------------------------------|---|-------|
| <b>374</b>      | CATCTCGGAAATATTCAGCCA          | - | 54165 |
| <b>W54841</b>   | CGGATACGCCTCCATGA              | + | 54360 |
| <b>W55204-1</b> | CAGCTCTAACTCGATTATTTCTAA       | - | 54723 |
| <b>W-34</b>     | CTCAACGGATAAAAGTTACT           | - | 98858 |
| <b>W5430</b>    | CTATGTCGAGCCAAGAGCATT          | - | 5441  |
| <b>W25382</b>   | ATTGTATGGGAAATACTTCAAGAA       | - | 24845 |
| <b>W80234-1</b> | GGATCTCGACAATACGAAGCA          | + | 79844 |
| <b>W33791</b>   | CTGCTGCAGGACAAGCTGTA           | - | 33338 |
| <b>W34156</b>   | GCCCTCTTCCTTCCCG               | - | 33692 |
| <b>W-10</b>     | AGTGGTATCGAGAATTGATCC          | + | 5596  |
| <b>71</b>       | GTTGCTTTCTACCACATCGTTTCAAACGAA | + | 5526  |

\*Primer sequences mentioned with both a “+” and “-” strand position are located in the Inverted Repeat region.
