# Supplementary material for: The Chloroplast Phylogenomics and Systematics of Zoysia (Poaceae)
Source: MDPI journal article supplement (doi:10.3390/plants10081517), 2021-07-24
Supplement: s1 [file s1]

**Table S1.** The GenBank accession number used in this study

| GenBank accession Number | Species                        |
|--------------------------|--------------------------------|
| KT168391                 | <i>Astrebla pectinata</i>      |
| KT168386                 | <i>Bouteloua curtipendula</i>  |
| KT168392                 | <i>Bouteloua gracilis</i>      |
| KT168383                 | <i>Centropodia glauca</i>      |
| KT168393                 | <i>Chloris barbata</i>         |
| KX765278                 | <i>Chloris truncata</i>        |
| KX765279                 | <i>Chloris virgata</i>         |
| KY024482                 | <i>Cynodon dactylon</i>        |
| KJ920229                 | <i>Danthonia californica</i>   |
| KT168394                 | <i>Distichlis bajaensis</i>    |
| KT168395                 | <i>Distichlis spicata</i>      |
| KU833246                 | <i>Eleusine indica</i>         |
| KT168384                 | <i>Eragrostis minor</i>        |
| KT168385                 | <i>Eragrostis tef 1</i>        |
| MF035981                 | <i>Eragrostis tef 2</i>        |
| KT168387                 | <i>Hilaria cenchroides</i>     |
| KT168396                 | <i>Hilaria rigida</i>          |
| KF356392                 | <i>Neyraudia reynaudiana</i>   |
| KT168389                 | <i>Sporobolus heterolepis</i>  |
| KP176438                 | <i>Sporobolus maritimus</i>    |
| KT168388                 | <i>Sporobolus michauxianus</i> |
| KT168390                 | <i>Zoysia macrantha</i>        |
| AP014937                 | <i>Zoysia matrella</i>         |
| MF953592                 | <i>Zoysia japonica</i>         |
| MF967579                 | <i>Zoysia sinica</i>           |
| MF967580                 | <i>Zoysia tenuifolia</i>       |
| MF967581                 | <i>Zoysia macrostachya</i>     |
