# Supplementary material for: The Chloroplast Phylogenomics and Systematics of Zoysia (Poaceae)
Source: MDPI journal article supplement (doi:10.3390/plants10081517), 2021-07-24
Supplement: s1 [file s1]

**Table S2. The Primer list of sequencing of *Zoysia japonica***

| Primer ID      | Sequence(5'-3')                    | Strand* | Position |
|----------------|------------------------------------|---------|----------|
| <b>320</b>     | TAGCCTTTGTTTGGCAAGCT               | -       | 7389     |
| <b>395</b>     | CTTCGGGATCGAACATCAAT               | -       | 4643     |
| <b>petB</b>    | CGTCTTGAGATTCAGGCAATTGCG           | -       | 72915    |
| <b>385</b>     | ACCTCCGGAGCTAATGAAAC               | +       | 78020    |
| <b>381</b>     | TATTCAGGGGATCCTTTCCC               | -       | 78630    |
| <b>rpoC1_1</b> | GTGGATACACTTCTTGATAATGG            | +       | 24530    |
| <b>rpoC1_4</b> | CCAACCTCAAGATATGCTTATGG            | -       | 25127    |
| <b>rps16</b>   | GTTCTTGTAGGTTGAGCGCCTTT            | -       | 4529     |
| <b>trnK5</b>   | TACTCTACCRTTGAGTTAGCAAC            | +       | 3902     |
| <b>22</b>      | GTTCTGTAGGTTGAGCCCCTTTTCAAGG       | -       | 4529     |
| <b>23</b>      | TTAAAAGCCGAGTACTCTACCGTTGAGTTA     | +       | 3890     |
| <b>301</b>     | ATCCGTTACGGTCGTCATTC               | +       | 44167    |
| <b>w54225f</b> | TCCTGAAGTTCTTTGTAACGTTGT           | +       | 53720    |
| <b>w55203</b>  | ACAGCTCTAACTCGATTATTTCCCT          | +       | 54698    |
| <b>w56135</b>  | AGACCCTGTCGTTGTGAGAA               | +       | 55686    |
| <b>ccsAf</b>   | TTAGAACATATACTAACTCA               | +       | 106187   |
| <b>ccsAr</b>   | TAATTTGGATCTGCTATTTT               | -       | 107058   |
| <b>284</b>     | AAAAGAACCGGCACAATACG               | -       | 129223   |
|                |                                    | +       | 87960    |
| <b>259</b>     | AAAAACCAAACCTCTGCCTTACG            | +       | 126586   |
|                |                                    | -       | 90596    |
| <b>40</b>      | CCTTGGCTAAACCTTGGAATCGTAATGC       | -       | 40118    |
| <b>370</b>     | GCAAGGCCTAATTGAAAAATGA             | +       | 39140    |
| <b>247</b>     | TCTCCGTTCCAGAACCGTAC               | -       | 44199    |
| <b>221</b>     | CAACCAATTATGCGCTTCAATATAATTACCAGGA | +       | 43084    |
| <b>99</b>      | GTAGATGCTACATAGTTGGTTCTCAT         | +       | 129267   |
|                |                                    | -       | 87911    |
| <b>106</b>     | TTGGGTTTCATTGATATTCCTGGTATAG       | +       | 86789    |
|                |                                    | -       | 130388   |
| <b>182</b>     | GAAGGTCACGGCGAGACGAG               | +       | 99278    |
|                |                                    | -       | 117906   |
| <b>9</b>       | GCCGACCGCTCTACCACTGAGCTACTGAGG     | +       | 116828   |
|                |                                    | -       | 100346   |
| <b>339</b>     | AACTGCAAAATCCGATCCAA               | +       | 127461   |
|                |                                    | -       | 89723    |
| <b>14</b>      | TAGCCCCAGAATGTTTCAGTTTATGCTCCT     | -       | 128662   |
|                |                                    | +       | 88512    |
| <b>165</b>     | CATTACCAAGATTAGCACGG               | +       | 165      |
| <b>168</b>     | TGCGTTTGTGGGTGGAATCCCCGAG          | -       | 39354    |
| <b>18</b>      | GTCTGTAAATACTGCATATTTGATTCCATC     | +       | 83668    |
|                |                                    | -       | 133506   |
| <b>340</b>     | TTGGAACGAGCATGAAGAAA               | -       | 84924    |
|                |                                    | +       | 132260   |
| <b>71</b>      | GTTGCTTTCTACCACATCGTTTCAAACGAA     | +       | 5525     |

|        |                                   |   |        |
|--------|-----------------------------------|---|--------|
| 72     | CCCGTTGCCTTACCACTTGGCCACGCCCCA    | - | 6862   |
| 27239F | CACTCATGGGGATCTGGT                | + | 26730  |
| 29456R | CAATACCAATTCCTTTTATTCCA           | - | 28968  |
| 29252F | TCAATTCGTTCGAACTTGCTT             | + | 28764  |
| 31653R | TATGACGAGGTTGCCTGACA              | - | 31180  |
| 13     | GTAACGCGTAAGAACCTGCCCTTGGGAGGGG   | - | 92722  |
|        |                                   | + | 124451 |
| 393    | TCCGAATCCGCTTTGTCTAC              | + | 92569  |
|        |                                   | - | 124615 |
| 43     | GCCC-ACTATTGGCCAAACCACCTGGGCACTAG | + | 42067  |
| 90     | TCCAGGCTTATTTGTCAAAAAAAAAATACACT  | + | 102112 |
|        |                                   | - | 115061 |
| 8      | GAACCACGGTGTCTGGGGGTTCTGAATCCCTC  | + | 100014 |
|        |                                   | - | 117160 |
| 303    | TAGGTTCTGAATCCTACTTGGG            | - | 100308 |
|        |                                   | + | 116875 |
| 39     | ACCTTATATTCCCTGAGGAGGTTCTACCACGT  | + | 10042  |
| 38     | TTGAAGAATCTTTTCCCTTCTTTGGTTATGTC  | - | 10454  |
| 25     | CTGGGACGGAAGGATTCTGAACCTCCGAATAGC | + | 6820   |
| 37     | ACTGTAAATTCGTTGGCAATATGTCTACGC    | - | 15660  |
| 161    | GCCCTTTTAACTCAGTGGTAGAC           | + | 14882  |
| 148    | GGCTTATATAGGTGAATCCTAGGA          | + | 32378  |
| 145    | GATTGGCTGTAGGGCTTGCTTCT           | - | 33267  |
| 321    | TGCTTAGTCTAGCTTTTATGGAAGC         | - | 33387  |
| 384    | GAGGGGAAGGATGGATTGTT              | + | 10691  |
| 164    | CTTAAAACTATACCGGTTTTCAAGA         | - | 11646  |
| 188    | TCAACCACTCAGCCATCTCTCCG           | - | 11680  |
| 246    | CCTTCCCTTAGAACCGTACTTG            | - | 43229  |
| 218    | TTCCTTCCCTTAGAACCGTACTTGAGAG      | - | 43227  |
| 73     | CGGAAAGAGAGGGATTCTGAACCCCTCGGTACG | + | 8059   |
| 368    | GTTGGTGTCAATTAGGCGGT              | - | 9337   |
| 76     | AATCCACTGATTTCTGCCGCTTCCGTTATTGC  | + | 33230  |
| 356    | TGCTGAATCGACGACCTATG              | - | 34490  |
| 24     | CGCCGCTTTAGTCCACTCAGCCATCTCTCC    | - | 8117   |
| 15     | GCTGTTAATACGAATAGAGAACTCTGT       | - | 88595  |
|        |                                   | + | 128580 |
| 19     | GTTGGGCGCTTTAACCATTCTAGCCATGGATGC | - | 83917  |
|        |                                   | + | 133255 |
| H415   | TATGGGGATGGTGAGAAGAG              | - | 134082 |
|        |                                   | + | 83102  |
| H428   | AAGGGGCATGATGACTTGAC              | + | 123423 |
|        |                                   | - | 93761  |
| H427   | ACCTTGACGTGGTGGAAGTC              | + | 92347  |
|        |                                   | - | 124837 |
| H429   | CGCATCTTCACAGACCAAGA              | + | 94819  |
|        |                                   | - | 122365 |

|         |                                     |   |        |
|---------|-------------------------------------|---|--------|
| 97      | ATATAGCTCAGTTGGTAGAGCTCCG           | - | 95268  |
|         |                                     | + | 121911 |
| 102     | CGCTCTACCACTGAGCTAATAGCCC           | - | 122758 |
|         |                                     | + | 94421  |
| H426    | CCCTATTGTTCCGATGGAGA                | + | 128422 |
|         |                                     | - | 88762  |
| H424    | TTTCGACCTTGGTTCCGTAG                | + | 87764  |
|         |                                     | - | 129420 |
| H422    | CTAAAGAGCGTGGAGGTTTCG               | - | 131057 |
|         |                                     | + | 86127  |
| 11      | CATTTGCTCGCCGCTACTACGGGAATCGC       | + | 120664 |
|         |                                     | - | 96510  |
| 21      | AACAGCAATCCAAGGTCGCATACCCAGACGGA    | + | 715    |
| W4052   | CAAAATAAACAGATCGGT                  | + | 4059   |
| 48      | CCCCAGAACCAGAAGTAGTAGGATTGATTCT     | - | 54894  |
| W-2     | TTCTCGCTATTTGGAATGGA                | - | 84119  |
|         |                                     | + | 133065 |
| W90942  | AATAAGGTTTGATCCTATTCATGG            | + | 128104 |
|         |                                     | - | 89076  |
| 256     | CTGGGGAGGTCCGTTTGATA                | + | 134992 |
|         |                                     | - | 82192  |
| W-3     | AATCCACTGCCTTGATCCAC                | - | 135373 |
|         |                                     | + | 81811  |
| W3004   | TGCTGATACATTAGAAAAATTAAA            | + | 3015   |
| W7487   | TGGATCTGTGCGGTAAGGAAAA              | + | 7762   |
| W27367  | CCGACCTTGTACGATCCC                  | + | 26858  |
| W108608 | AAGCACAATAACTACGCCAAG               | + | 106485 |
| W110557 | TAATTCTAACTCCCACATGATAAAA           | - | 108402 |
| W112176 | CGATTCATTTCAATCTGAGGA               | + | 110020 |
| W114051 | TTCGGTTTGATAACCTGCTA                | - | 111953 |
| W-1     | CGAGATCCACCCTACAATA                 | + | 127330 |
|         |                                     | - | 89855  |
| W6509   | TTTTGTGTCGTGCAGAGC                  | + | 6770   |
| H465    | AGTGGTTCAAGGCGTAGCAT                | - | 45638  |
| 210     | GTGTGTATTTTTCGTTGGGGATTT            | - | 58812  |
| 288     | ATCAATATATCTGTTATGTAGCTTACCCCTTAGAC | + | 56020  |
| 129     | GCTCTGTAGGATTTGAACCTACGACATC        | + | 64771  |
| 237     | AAGTATTTTACGATTAAGAAG               | - | 67258  |
| 264     | CCTTTTTTCATTGCTTTTTCGA              | - | 80331  |
| W113787 | TTGATCCATTCTCATCCTGG                | + | 111689 |
| W115436 | CAAAACGATATCCCAAAGGG                | - | 113345 |
| 212     | CAGGAGCAGGGTCGGTCAAAT               | - | 53910  |
| C011    | GGGCTATACGGACTCGAACC                | + | 51987  |
| 374     | CATCTCGGAAATATTCAGCCA               | - | 54141  |
| 82      | CTATGGAGAAATTGGTAGACACGCTGCTCT      | - | 106020 |
| C002    | GACCCCATACCTAGAGCTAACA              | + | 103499 |

|                |                                  |   |        |
|----------------|----------------------------------|---|--------|
| <b>H409</b>    | GGTGAAATTGGTAGACACGC             | - | 106024 |
| <b>W108711</b> | TCTCAGTGGTTAATGATGCATG           | - | 106568 |
| <b>W947</b>    | GAAACAGGCTCACGAATACCA            | + | 947    |
| <b>W2279</b>   | GCGAGAAATTGACAAGGTAAGA           | - | 2290   |
| <b>W4463</b>   | TCAAAGTCTTTCTTTATCTTTAAA         | + | 4473   |
| <b>W5430</b>   | CTATGTCGAGCCAAGAGCATT            | - | 5441   |
| <b>H481</b>    | AATGATGTCGAGCCAAGAGC             | + | 5439   |
| <b>W7136</b>   | GCGTTTGTTTGGAAGC                 | + | 7391   |
| <b>163</b>     | AGGAGAGAGAGGGATTCTGAACCCT        | + | 11614  |
| <b>W13690</b>  | AGAACGAATCACACTTTTACCAC          | - | 13839  |
| <b>162</b>     | CATCGGTTCAAATCCGATAAGGGGCT       | - | 14928  |
| <b>W13308</b>  | CGGTTCTAGTAAACCAAAACCA           | + | 13458  |
| <b>W25288</b>  | GCTTTTTCAGCTATTTGTAATTCTG        | + | 24748  |
| <b>W27428</b>  | CACACGTACCCGTCATGG               | - | 26919  |
| <b>W29987</b>  | TCAAATTTTCATTGTTAATATGGAC        | + | 29505  |
| <b>W31365</b>  | TTTGATGCAGCAAGTCAGG              | + | 30892  |
| <b>146</b>     | GCAGCATGGTACTCTTTCTACCACTA       | + | 34319  |
| <b>W37015</b>  | AAAGCCATGAAACAAGTAGCTG           | - | 36531  |
| <b>W39972</b>  | TACTCGAATCAGGATTTTGG             | + | 39429  |
| <b>W41797</b>  | TGTGGTGTGTGAACAAGGAAA            | - | 41254  |
| <b>42</b>      | CTATCTACCAAAATTTAACTTCTGGTTCCGGC | - | 42381  |
| <b>W41549</b>  | TATGGCGGTATCCGAAAACA             | + | 41006  |
| <b>W54841</b>  | CGGATACGCCTCCATGA                | + | 54336  |
| <b>W54225</b>  | TCCTGAAGTTCTTTGTAACGTTGT         | + | 53720  |
| <b>69</b>      | CAACCCCTTGGGGTTATCCTGCACTTGGA    | + | 135199 |
|                |                                  | - | 81975  |
| <b>W80924</b>  | TGACGTGGATTGTATCGATTTC           | + | 80544  |
| <b>H432</b>    | GGGTTATCCTGCACTTGGA              | + | 135209 |
|                |                                  | - | 81975  |
| <b>W107400</b> | GCAATAGATGTCTTTCACATACAA         | + | 105261 |
| <b>260</b>     | AAGGATTTACCCGGTGTGAG             | - | 126720 |
|                |                                  | + | 90464  |
| <b>W94612</b>  | TCCAAGGGCAGGTTCTTAC              | + | 124455 |
|                |                                  | - | 92729  |
| <b>W95255</b>  | CCATCGTTTACGGCTAGGAC             | - | 123812 |
|                |                                  | + | 93372  |
| <b>W98266</b>  | CTTATCTCCAGCCCGTGAAC             | + | 96137  |
|                |                                  | - | 121047 |
| <b>W100297</b> | GGTCTCCGCAAAGTCGTAAG             | - | 98177  |
|                |                                  | + | 119007 |
| <b>W105011</b> | CCGTTTCATGAGGATAGACAAA           | - | 102900 |
| <b>H401</b>    | GCCAGTCCAATAGCTGCTTC             | + | 109763 |
| <b>W18889</b>  | TTCTGCCCTAAGACTATGGATT           | + | 18208  |
| <b>W20819</b>  | GGAATGGAAATGAGGGAATG             | - | 20279  |
| <b>W19456</b>  | TTCTGACATCTTAGTCTCGTAGTTT        | + | 18775  |
| <b>W21210</b>  | CTCGGAATTAGACCATAAGGG            | - | 20670  |

|         |                                  |   |        |
|---------|----------------------------------|---|--------|
| W20900  | GCTTGGCAGAAGAACTTGAGA            | + | 20360  |
| W22691  | GTATGCACCAAAAACCTCGG             | - | 22151  |
| 34      | CTCGGGGATGGAAATGAGGGAATATCTACAAT | + | 20275  |
| 156     | AAGATGTGAATTAGGAAGGATTGG         | + | 21027  |
| W22358  | TTGCATGGGAACAGATTCAT             | + | 21818  |
| W23878  | GAAATACTTAATGCTACGATCTGGG        | - | 23338  |
| W58483  | GATTTTAACTTACCCTCTATTTTCG        | + | 58046  |
| W60385  | CTACTAATTCGTTGGGTCTACAA          | - | 59948  |
| W61165  | CCGACCGTATTTCTCCTGA              | + | 60708  |
| W62668  | AGAGATGAACCCAATCCAGAA            | - | 62212  |
| W62250  | GCTAGTTGAGTAGTTTTGATTAAGG        | + | 61777  |
| W63625  | CCCGAAACAGAATTCCTT               | - | 63169  |
| W72808  | TCATCAAGCGGTTCTTATTCG            | + | 72421  |
| W74664  | TTCAATGAGTAGTTATAGGCGCA          | - | 74261  |
| 58      | CTGCCGTATTTATGTTAATGCACTTTCCAATG | + | 73468  |
| W74410  | GCATTCATTTTCTTTGCATCG            | + | 74007  |
| 313     | CAATTTTTGTTTTTCTTCTAGACGA        | - | 46416  |
| W79014  | GGTTTAACAACGGCTACCCA             | - | 78609  |
| W5578   | AATGGTATCGAGAATTGATCC            | + | 5595   |
| W6851   | CAAGGAGGTATTTTGTGTTTGG           | - | 7107   |
| W10898  | CTAATGCGTTCCCAACG                | + | 11056  |
| W12264  | ATAGAAAATGAAACGGTCGACC           | - | 12426  |
| W14720  | AATAGTCAAGTACCCCATTTCC           | - | 14317  |
| W32396  | GCAAAACTCAGATTGGAGAAGAA          | - | 31918  |
| W38034  | ATCTTGTTGCACCCGGTAAC             | + | 37504  |
| W39284  | GTCTTACCATGAGCAGATTGTAT          | - | 38741  |
| W57280  | TCAGGACTGGGTATCCATGC             | + | 56831  |
| W58952  | TGAATTGGCGATCAGAACAC             | - | 58510  |
| 219     | GGCCTAGTATTTCCGGCAAT             | - | 58082  |
| W65036  | CGAACAAATCGAAATGATTGAA           | + | 64518  |
| W66044  | CGTTTATTCCCAGATGCTTT             | - | 65523  |
| W105880 | ACGTGAAGAGGGAATTGTGC             | + | 103769 |
| W11893  | TTTCCAATTAGCTGTTTTTGCAT          | + | 12056  |
| W12997  | CATCGTTAGCTTGGAAGGCT             | + | 13146  |
| W27717  | CGTCGATTACCAAAAACAAGC            | + | 27208  |
| W30641  | TTGGTTGAAAGGCCTGAAAG             | + | 30159  |
| W36871  | GACGTTTCCGCCTATATTCC             | + | 36387  |
| W38591  | GAAAGAGCCACGGGCTTAT              | - | 38048  |
| W51430  | TACCAAAATAGGAATAAGGCTTG          | + | 50972  |
| W53119  | CCCTTGTCAGAGATATCTTAACAT         | - | 52653  |
| W99809  | GTCCATCGACTACGCCTTTC             | - | 119495 |
|         |                                  | + | 97689  |
| W119602 | TGCGGTGACGATACTGTAGG             | + | 117519 |
|         |                                  | - | 99665  |
| W9275   | CTGTTCAATTGCGGCCTTAT             | - | 9433   |
| W80090  | TCCACATCCCTTTAGTTTTGC            | + | 79683  |

|                |                               |   |        |
|----------------|-------------------------------|---|--------|
| <b>W82197</b>  | TCAAGGCAGTGGATTGTGAA          | + | 81816  |
|                |                               | - | 135368 |
| <b>98</b>      | ATGAAGCTTATCCCCATCGTCTC       | - | 119904 |
|                |                               | + | 97276  |
| <b>W80234</b>  | GGATCTCGACAATACGAAGCA         | - | 79823  |
| <b>W104124</b> | GCAAGTCTCCGTATCTTATTGG        | - | 115169 |
|                |                               | + | 102013 |
| <b>W115355</b> | ATCCCGCCATGAGAAG              | + | 113264 |
| <b>W16232</b>  | GATTCGACTTCCCCTAGGG           | - | 15546  |
| <b>276</b>     | ACCATTAAGCAGCCCAAGC           | - | 18086  |
| <b>W17778</b>  | AGAATGCAAGTCCTCCCCTT          | + | 17035  |
| <b>W23499</b>  | TGAGCAAGAGGCTTCAAGAAA         | + | 22959  |
| <b>W25382</b>  | ATTGTATGGGAAATACTTCAAGAA      | - | 24842  |
| <b>W31373</b>  | CAGCAAGTCAGGGAAAAAGC          | - | 30900  |
| <b>W46254</b>  | TAGCAAATTACTGTGGTATGTAAAA     | - | 45806  |
| <b>W48442</b>  | GGATAGGTGCAGAGACTCAATG        | + | 47943  |
| <b>W50280</b>  | AGATAACCAACCCTGCTGCA          | - | 49821  |
| <b>W59953</b>  | AACAAATGTCTGGAACCTTGGGA       | + | 59516  |
| <b>W61817</b>  | TCCTTATTTCTATCTCATGCAAA       | - | 61361  |
| <b>242</b>     | GGAGATGCAGAAATAGTACTTCAAGA    | - | 61166  |
| <b>130</b>     | GTATTTCTAATAAGTTGTTAATAGTTGG  | - | 68318  |
| <b>W67189</b>  | GGCTCGTATTTTATCTTTCTTACCA     | + | 66749  |
| <b>W73004</b>  | AAATAGGGAAGAGAAAAGTCAAG       | + | 72603  |
| <b>W76846</b>  | GGGTGATGCTTTTCTTGAGC          | + | 76439  |
| <b>W78260</b>  | GCAATAGTGTCTTGCCCAT           | - | 77854  |
| <b>253</b>     | GCATTGTCATCATATCGTATTATCA     | - | 78134  |
| <b>66</b>      | AGGGCATTTCCTTGGATATAGGAACTTTT | - | 83018  |
|                |                               | + | 134156 |
| <b>W81925</b>  | GGTAGAATGCTAGATGCCCCG         | + | 81544  |
|                |                               | - | 135640 |
| <b>W77590</b>  | ATTTTGACCCTATCCCCCAT          | - | 77187  |
| <b>W3692</b>   | GGCTCTATCCATTATTCAGTAGAC      | - | 3695   |
| <b>W-4</b>     | TTGTTTACGAAGAAATAATAACAA      | + | 2519   |
| <b>W-5</b>     | CAGATCGGTAAATTTCACTG          | - | 4068   |
| <b>W34488</b>  | ACCGATATTTTAGCAACAAATCTAA     | + | 33999  |
| <b>W36012</b>  | TGCTCGTATTATAGGTCTTGGTGA      | - | 35528  |
| <b>W-6</b>     | TGAATACCGATTTACATTTCCG        | + | 35250  |
| <b>174</b>     | GAGATGGCCGAGTGGTTGAAGGCG      | - | 45628  |
| <b>W44580</b>  | CCTTTGTATGCTCTCCATTGC         | + | 44024  |
| <b>W45797</b>  | GCGTAACGTACCTTATGCAA          | + | 45331  |
| <b>W47393</b>  | GCATTACAAATGCGATGCTC          | - | 46918  |
| <b>W46864</b>  | CAGACCATAATGAAAACGCAAT        | + | 46398  |
| <b>W49145</b>  | TGAAAATCCTCGTGTACCA           | - | 48779  |
| <b>W48828</b>  | CCTCTATCCCCAAACCTCT           | + | 48392  |
| <b>W50130</b>  | AGCACATTGGGAACGTAAAT          | + | 49671  |
| <b>W51362</b>  | CCCGATTCATAACTAGAAAGC         | - | 50904  |

|         |                              |   |        |
|---------|------------------------------|---|--------|
| W-7     | CTATCACATCGAACCCGTTT         | - | 55988  |
| W64314  | TTTCTTCTCCTCTTATTCCATATGG    | + | 63823  |
| W65536  | AAAACAAACGCGCTACCAAG         | - | 65007  |
| 128     | CCACGTTCTACCGAACTGAACTAAGAGC | - | 64812  |
| 231     | TATAATAGGTAGGGATGACAGGA      | - | 64959  |
| W67341  | GAAACTCCAACCAGAATTTAAGA      | - | 66901  |
| W-8     | TGATCATATATGTATTCCAATAAGG    | + | 65394  |
| W69005  | CCATAAGCTTTGGCTTCGTC         | - | 68579  |
| W69829  | AAGCTACCCATTGCATATTG         | + | 69428  |
| W71184  | GAATTGTGAGAGCGGACGTT         | - | 70779  |
| W70884  | GGGATCAGGGATACTTTCAGC        | + | 70479  |
| W71750  | CGAATCTATGGAAGCATTGG         | - | 71352  |
| W72170  | GGCTACACAAACCGTTGAAGA        | - | 71750  |
| W122891 | TGCTTATTTTCAACTCCCCG         | + | 120812 |
|         |                              | - | 96372  |
| W118236 | TCGTGAAAAGTGATACCTGTGAA      | + | 116141 |
|         |                              | - | 101040 |
| W137891 | TCTCACCATCCCCATAGTGT         | - | 83106  |
|         |                              | + | 134078 |
| W92021  | CGAATTGTTTGTTGACACGG         | + | 90155  |
|         |                              | - | 127029 |
| W93455  | ATGAGAGAAGCACAGAGGTCA        | - | 91605  |
|         |                              | + | 125578 |
| W128213 | ATGATCCGATCGATTGC            | + | 91322  |
|         |                              | - | 125865 |
| W92518  | ATCCTTACTGTCCCTCTACAGAA      | - | 90652  |
|         |                              | + | 126529 |
| W130055 | ATGGCAAGTGCTCTTCCTTG         | + | 89467  |
|         |                              | - | 127717 |
| W125083 | TACCACTGAGCTAATAGCCCCG       | + | 122763 |
|         |                              | - | 94420  |
| W126193 | GCCGACACTGACACTGAGAG         | + | 93312  |
|         |                              | - | 123872 |
| W124160 | CCCGAAAAGGAGTCTATTGA         | - | 95099  |
|         |                              | + | 122085 |
| W125409 | GCTGGATCACCTCCTTTTCA         | + | 94096  |
|         |                              | - | 123088 |
| W118951 | CTGGTCGTAGGTTCGAATCC         | - | 116868 |
|         |                              | + | 100316 |
| W109967 | CCGATAAATCCATGGGATA          | - | 107812 |
| W111122 | GATAGAGCCATGCTGCG            | - | 108963 |
| W-9     | GAACAAAATCTGGATAGATACCGA     | + | 107390 |
| W110391 | TCAATCTTTCCAAATCTAATCC       | + | 108236 |
| W112816 | CCTAGTAGAAGAACAAATCCCC       | + | 110659 |
| W-10    | AGTGGTATCGAGAATTGATCC        | + | 5595   |
| W-11    | TAAGGAGGTATTTTGTCTTTGG       | - | 7107   |

|                 |                            |   |        |
|-----------------|----------------------------|---|--------|
| <b>W-14</b>     | GGGGTTGTATGATATATCAGGC     | + | 31706  |
| <b>W-15</b>     | CAATATATAGAATTCCGGAATTG    | - | 32778  |
| <b>W31723</b>   | GCCATTTTGGGGATTTCCTAC      | + | 31250  |
| <b>W33791</b>   | CTGCTGCAGGACAAGCTGTA       | - | 33315  |
| <b>W-16</b>     | GTGGACTAGCACTTGATTTCG      | + | 55074  |
| <b>W56293</b>   | CTTGGCAGCATTCCGAGTA        | - | 55844  |
| <b>W56344</b>   | AGGGGCTGCAGTAGCTG          | - | 55895  |
| <b>W55204</b>   | CAGCTCTAACTCGATTATTTCCCTAA | + | 54699  |
| <b>W76331</b>   | TGGATTCTTCAATACCTACTATTGT  | - | 75926  |
| <b>W-17</b>     | GCCGTCAATGATTGGTGAGC       | + | 74640  |
| <b>W-18</b>     | GCATCTATAGGATAACTTCCATC    | + | 75655  |
| <b>W116493</b>  | CGATGCGAAAGTAATTATGC       | - | 114411 |
| <b>W-19</b>     | GTAAAGAGTTTACACTGCTTATG    | + | 112950 |
| <b>W115989</b>  | TTACATAAAGCTCTTGCTTTGATA   | + | 113907 |
| <b>W-12</b>     | TCCTACGAAAGCATAACAGAAAA    | - | 15341  |
| <b>W-13</b>     | TTCTGACACCTTAACGCATAGTTT   | - | 18775  |
| <b>W16206</b>   | CATCTCTCTTTCAAGGAGGCA      | + | 15520  |
| <b>W8579</b>    | TTAAAAGATAGGCTTTGAAATAGG   | + | 8742   |
| <b>W10070-1</b> | GGAGCAATGAACCTATTTGAAG     | - | 10228  |
| <b>W10070</b>   | GGAGCAATGAACCTATTTGAAG     | + | 10228  |
| <b>W11523</b>   | ACTCAGCCATCTCTCCACAG       | - | 11686  |
| <b>W26767</b>   | CGGATCCTCAAGGACAAATG       | - | 26258  |
| <b>W25894</b>   | GCTCCGATGGAACTAGATCA       | + | 25345  |
| <b>W84777</b>   | CGTTTTCATTTACCATCTCATG     | + | 84368  |
|                 |                            | - | 132814 |
| <b>W88291</b>   | GAAGCCCAAAGAGGTGCATA       | - | 86413  |
|                 |                            | + | 130771 |
| <b>W18055</b>   | CCGGTTGGAATCATAAAGTG       | - | 17314  |
| <b>W71818</b>   | TCTTCTTCCGAGAACCACCT       | + | 71420  |
| <b>W111245</b>  | ATTTGCTTGGCTTTACATCC       | + | 109086 |
| <b>W112337</b>  | TTCTAAGTATTTCTTATTGTCGAGC  | - | 110180 |
| <b>W111787</b>  | TTTCTATTCATCTTAATGTTCCG    | - | 109627 |
| <b>W-20</b>     | TTCAATTGGTTAGAGCACCG       | + | 16076  |
| <b>W-21</b>     | TTCTGCCCTAAGACTCTGGATG     | - | 18208  |
| <b>W133811</b>  | TGGGATCGTTTGATCGATTT       | - | 85692  |
|                 |                            | + | 131492 |
| <b>W135950</b>  | GGGTCGCTTCTTATGGACT        | + | 85030  |
|                 |                            | - | 132155 |
| <b>W-23</b>     | TAACGTGAATTGTATCGATTTC     | - | 80544  |
| <b>W-22</b>     | AAGATCTTCTTTTCTCCATCTC     | + | 16693  |

\*Primer sequences mentioned with both a “+” and “-” strand position are located in the Inverted Repeat region.
